# Supplementary material for: Di-amidosils with tunable structure, morphology and emission quantum yield: the role of hydrogen bonding
Source: Royal Society of Chemistry journal article supplement (doi:10.1039/c5tc00721f), 2015-01-01
Supplement: c5tc00721f1.pdf [file c5tc00721f1.pdf]

## Supporting Information

# Di-amidosils with Tunable Structure, Morphology and Emission Quantum Yield: The Role of Hydrogen Bonding.

*S. C. Nunes,<sup>a,b\*</sup> J. Hümmer,<sup>b</sup> V. T. Freitas,<sup>c</sup> R. A. S. Ferreira,<sup>c</sup> L. D. Carlos,<sup>c</sup> P. Almeida,<sup>a</sup> V. de Zea Bermudez<sup>b,d\*</sup>*

<sup>a</sup>*Chemistry Department and CICS – Health Sciences Research Centre, University of Beira Interior, 6200-001 Covilhã.*

<sup>b</sup>*Chemistry Department, University of Trás-os-Montes e Alto Douro, 5000-801 Vila Real.*

<sup>c</sup>*Physics Department and CICECO, University of Aveiro, 3810-193 Aveiro, Portugal,*

<sup>d</sup>*CQ-VR, University of Trás-os-Montes e Alto Douro, 5000-801 Vila Real.*

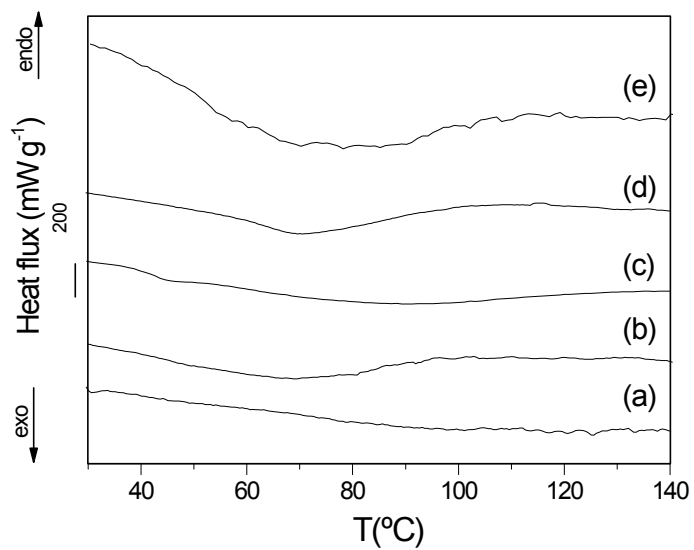

**Figure S1.** DSC curves of the SG-d-A(10) (a), BC-d-A(10) (b), AC-d-A(10) (600:0.2:0) (c), AC-d-A(10) (600:0.2:100(ethanol)) (d) and AC-d-A(10) (600:1:0) (e) di-amidosils.

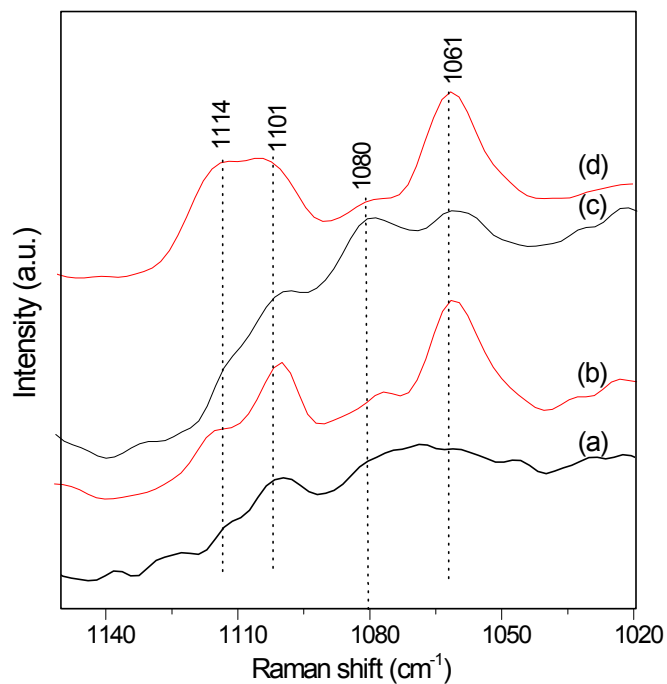

**Figure S2.** FT-Raman spectra of the d-A(10)-SG (a), AC-d-A(10) ((600:0.2:0) (b) AC-d-A(10) (600:0.2:100(ethanol)) (c) and AC-d-A(10) ((600:1:0) (d) di-amidosils in the vC-C region.

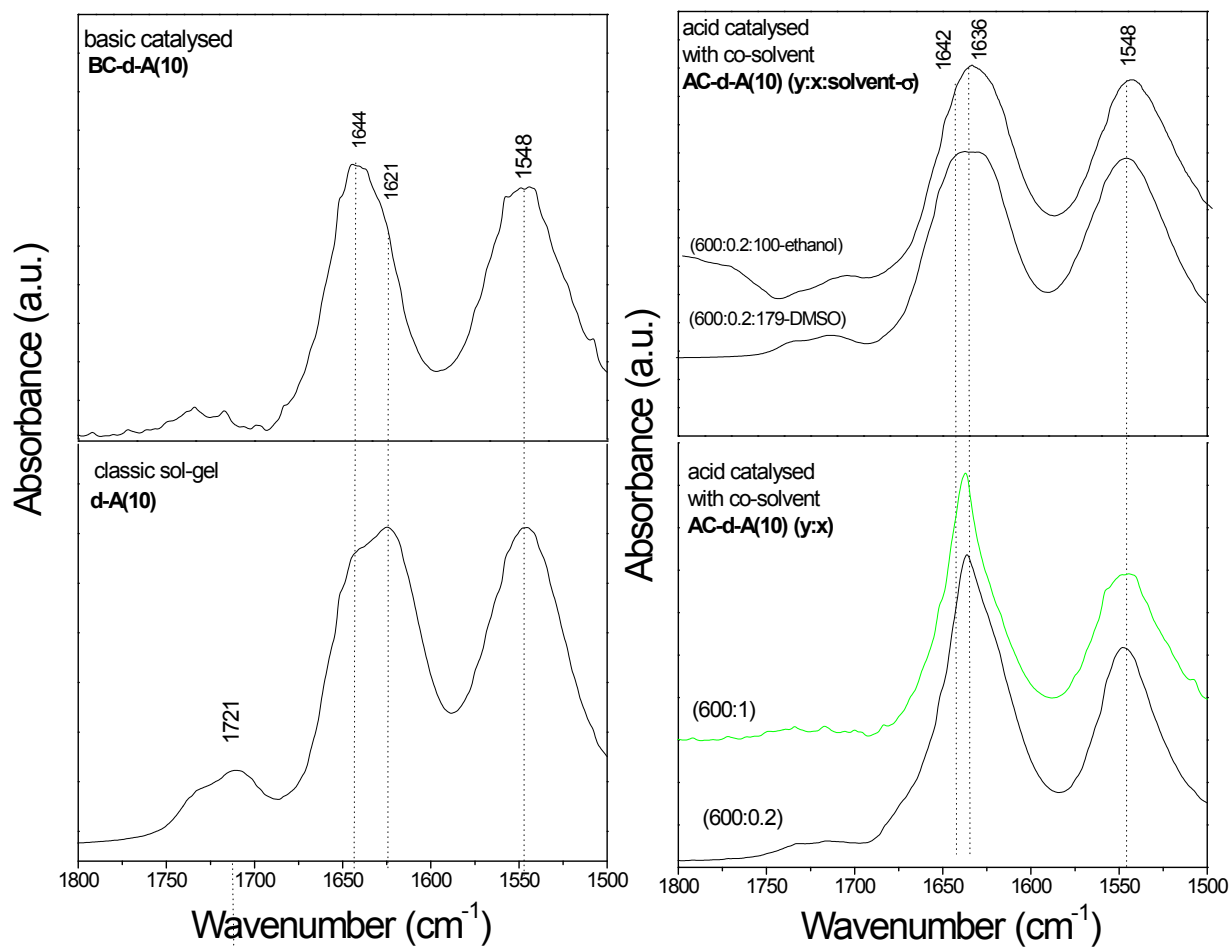

**Figure S3** FT-IR spectra in the amide I and amide II regions of d-A(10), AC-d-A(10) (y:x), AC-d-A(10) (y:x: solvent- $\sigma$ ) and BC-d-A(10) di-amide alkyl/siloxane hybrid materials.

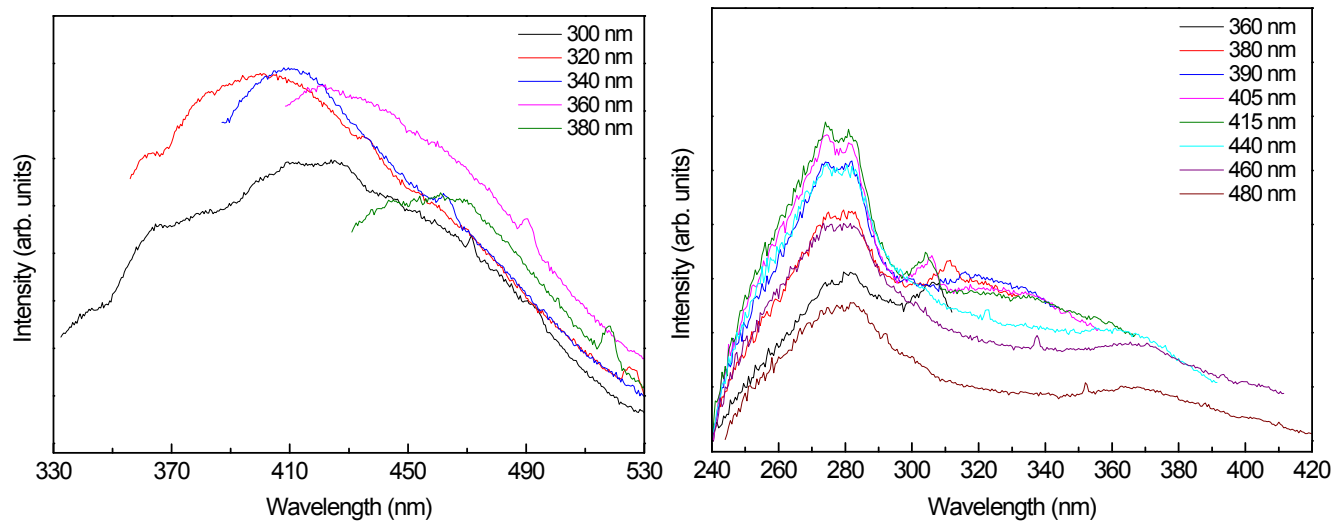

**Figure S4.** Low-temperature, 12 K, (left) emission and (right) excitation spectra of SG-d-A(10) as function of the excitation and monitoring wavelengths, respectively.

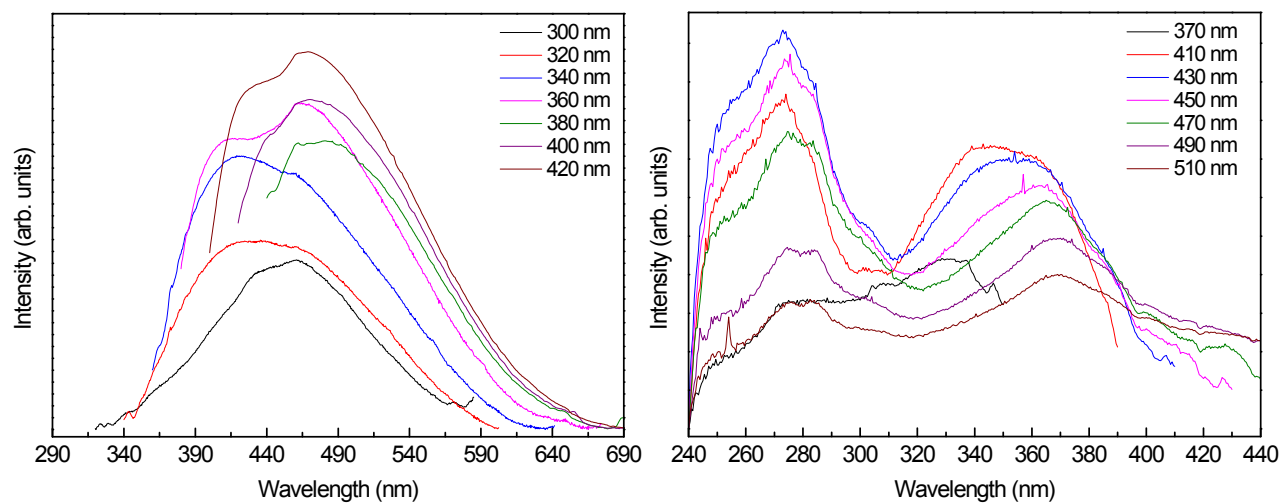

**Figure S5.** Low-temperature, 12 K, (left) emission and (right) excitation spectra of AC-d-A(10)(600:0.2:0) as function of the excitation and monitoring wavelengths, respectively.

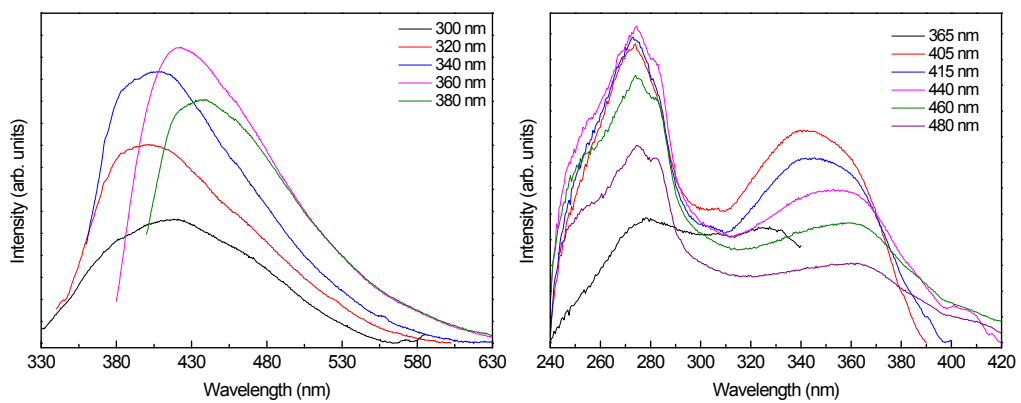

**Figure S6.** Low-temperature, 12 K, (left) emission and (right) excitation spectra of BC-d-A(10) as function of the excitation and monitoring wavelengths, respectively.

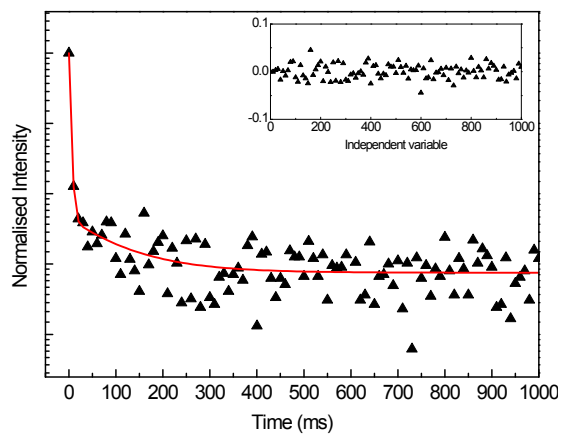

**Figure S7.** Low-temperature, 12 K, emission decay curves of SG-d-A(10) excited at 360 nm and monitored at 500 nm. The solid line represents the data best fit using a bi-exponential function;  $I(t)=I_1\times\exp(-(t-t_0)/\tau_1)+I_2\times\exp(-(t-t_0)/\tau_2)$ ,  $t_0=0.05$  ms. The inset shows the regular residual plot for a better judgement of the fit quality ( $R_2>0.96$ ).



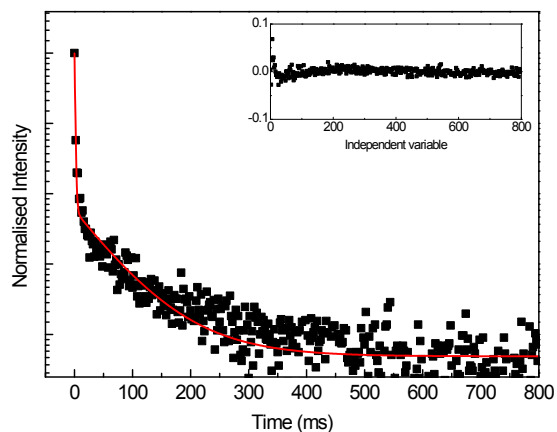

**Figure S8.** Low-temperature, 12 K, emission decay curves of AC-d-A(10)(600:0.2:0) excited at 360 nm and monitored at 495 nm. The solid line represents the data best fit using a bi-exponential function;  $I(t)=I_1 \times \exp(-(t-t_0)/\tau_1)+I_2 \times \exp(-(t-t_0)/\tau_2)$ ,  $t_0=0.05$  ms. The inset shows the regular residual plot for a better judgement of the fit quality ( $R_2>0.98$ ).

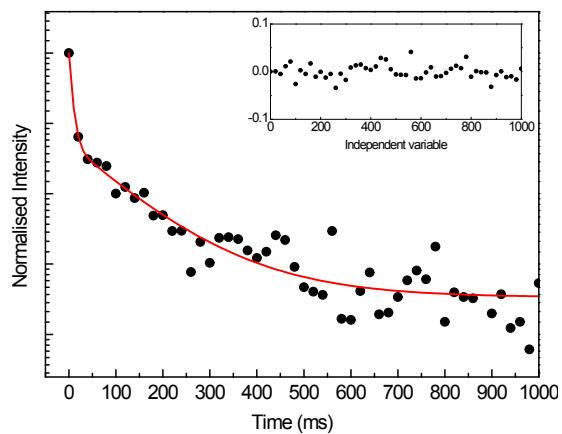

**Figure S9.** Low-temperature, 12 K, emission decay curves of BC-d-A(10) excited at 360 nm and monitored at 490 nm. The solid line represents the data best fit using a bi-exponential function;  $I(t)=I_1 \times \exp(-(t-t_0)/\tau_1)+I_2 \times \exp(-(t-t_0)/\tau_2)$ ,  $t_0=0.05$  ms. The inset shows the regular residual plot for a better judgement of the fit quality ( $R_2>0.96$ ).

**Table S1** Relevant details of the various synthesis conditions used to produce the acid- and base-catalyzed d-A(10)-based di-amidosils.

| Acid-catalyzed hydrolysis                                                                |                          | AC-d-A(10) (y:x: $\sigma$ (solvent))              |  |
|------------------------------------------------------------------------------------------|--------------------------|---------------------------------------------------|--|
| molar ratio precursor:H <sub>2</sub> O:HCl:co-solvent = 1:y:x: $\sigma$                  |                          |                                                   |  |
| Materials                                                                                | Without co-solvent       |                                                   |  |
|                                                                                          | 1:600:1:0                | 1:600:0.2:0                                       |  |
| d-ADPTES(10)                                                                             | 1gr (1.57 mmol)          | 1gr (1.57 mmol)                                   |  |
| H <sub>2</sub> O                                                                         | 17 mL (942 mmol)         | 17 mL (942 mmol)                                  |  |
| HCl (1 M)                                                                                | 1.6 mL (1.57 mmol)       | 314 $\mu$ L (0.314 mmol)                          |  |
| With co-solvent                                                                          |                          |                                                   |  |
|                                                                                          | 1:600:0.2:179(DMSO)      | 1:600:0.2:100(CH <sub>3</sub> CH <sub>2</sub> OH) |  |
| d-ADPTES(10)                                                                             | 1g (1.57 mmol)           | 1g (1.57 mmol)                                    |  |
| H <sub>2</sub> O                                                                         | 17 mL (942 mmol)         | 17 mL (942 mmol)                                  |  |
| HCl (1 M)                                                                                | 314 $\mu$ L (0.314 mmol) | 314 $\mu$ L (0.314 mmol)                          |  |
| DMSO                                                                                     | 20 mL (0.281 mol)        | -                                                 |  |
| CH <sub>3</sub> CH <sub>2</sub> OH                                                       | -                        | 9 mL (0.157 mol)                                  |  |
| Base-catalyzed hydrolysis                                                                |                          | BC-d-A(10)                                        |  |
| molar precursor:H <sub>2</sub> O:CH <sub>3</sub> CH <sub>2</sub> OH:NaOH = 1:39:315:0.23 |                          |                                                   |  |
| d-ADPTES(10)                                                                             | 0.8421 g (1.32 mmol)     |                                                   |  |
| CH <sub>3</sub> CH <sub>2</sub> OH                                                       | 3 mL (51.4 mmol)         |                                                   |  |
| H <sub>2</sub> O                                                                         | 7.5 mL (417 mmol)        |                                                   |  |
| NaOH (3 M)                                                                               | 100 $\mu$ L (0.3 mmol)   |                                                   |  |

**Table S2** Details and attribution of the components of the FT-IR amide I and amide II bands of the SG-d-A(10), AC-d-A(10)-based and BC-d-A(10) di-amidosils. F, D and O stand for free, disordered and ordered.

| FT-IR amide I and amide II bands           |                               |                                                                            |                  |                 |                |                |                |                |
|--------------------------------------------|-------------------------------|----------------------------------------------------------------------------|------------------|-----------------|----------------|----------------|----------------|----------------|
| Samples                                    |                               | $\bar{\nu}$ (in $\text{cm}^{-1}$ ) (fwhm in $\text{cm}^{-1}$ ) (area in %) |                  |                 |                |                |                |                |
| SG-d-A(10)                                 |                               | 1733 (18) (3)                                                              | 1710 (28) (3.4)  | 1656 (22) (5.4) | 1639 (28) (22) | 1617 (31) (23) | 1562 (35) (19) | 1537 (35) (23) |
| AC-d-A(10)<br>(y:x)                        | y = 600; x = 1                |                                                                            |                  | 1647 (16) (15)  | 1635 (16) (25) | 1619 (23) (15) | 1557 (24) (17) | 1543 (31) (25) |
|                                            | y = 600; x = 0.2              |                                                                            |                  | 1649 (25) (13)  | 1635 (18) (22) | 1619 (22) (29) | 1555 (24) (14) | 1543 (30) (21) |
| AC-d-A(10)<br>(y:x: $\sigma$ -<br>solvent) | y = 600; x = 0.2, 179 -DMSO   | 1726 (16) (1.0)                                                            | 1707 (21) (2.6)  | 1650 (25) (12)  | 1636 (33) (20) | 1618 (35) (21) | 1558 (40) (21) | 1539 (41) (22) |
|                                            | y = 600; x = 0.2:100- ethanol | 1730 (13) (0.5)                                                            | 1713 ( 14) (0.7) | 1652 (24) (11)  | 1636 (29) (22) | 1618 (29) (18) | 1560 (37) (19) | 1540 (39) (27) |
| BC-d-A(10)                                 |                               | 1736 (26) (23)                                                             | 1718 (27) (1.4)  | 1656 (25) (17)  | 1640 (19) (16) | 1623 (25) (19) | 1560 (26) (20) | 1539 (27) (24) |
| Attribution                                |                               | F                                                                          | D1               | D2              | O1             | O2             | amide II       |                |
|                                            |                               | amide I                                                                    |                  |                 |                |                |                |                |
